# Supplementary material for: Postoperative radiotherapy after extirpative surgery may not improve survival in patients with Masaoka-Koga stage IIB thymoma: a propensity-matched study based on the SEER database
Source: PubMed Central journal article supplement — J Thorac Dis. 2024 Oct 30;16(10):6381–90. doi: 10.21037/jtd-24-1061 (PMC11565301; doi:10.21037/jtd-24-1061), 2024-10-30
Supplement: jtd-16-10-6381-supplementary.pdf [file jtd-16-10-6381-supplementary.pdf]

**Table S1** Factors associated with OS in patients with stage IIB thymoma before PSM

| Factors              | Univariate analysis  |        | Multivariate analysis |        |
|----------------------|----------------------|--------|-----------------------|--------|
|                      | HR (95% CI)          | P      | HR (95% CI)           | P      |
| <b>Age</b>           |                      |        |                       |        |
| <65 years            | 1.000 (reference)    |        | 1.000 (reference)     |        |
| ≥65 years            | 3.686 (2.204, 6.166) | <0.001 | 4.644 (2.705, 7.971)  | <0.001 |
| <b>Gender</b>        |                      |        |                       |        |
| Male                 | 1.000 (reference)    |        | –                     | –      |
| Female               | 0.831 (0.503, 1.370) | 0.46   | –                     | –      |
| <b>Race</b>          |                      |        |                       |        |
| White                | 1.000 (reference)    |        | –                     | –      |
| Black                | 0.989 (0.445, 2.198) | 0.97   | –                     | –      |
| Others               | 0.682 (0.352, 1.321) | 0.25   | –                     | –      |
| <b>WHO histology</b> |                      |        |                       |        |
| Low risk             | 1.000 (reference)    |        | 1.000 (reference)     |        |
| High risk            | 1.848 (1.007, 3.389) | 0.047  | 2.407 (1.292, 4.484)  | 0.006  |
| NOS                  | 1.668 (0.903, 3.081) | 0.10   | 1.880 (1.005, 3.517)  | 0.048  |
| <b>Chemotherapy</b>  |                      |        |                       |        |
| No                   | 1.000 (reference)    |        | 1.000 (reference)     |        |
| Yes                  | 1.136 (0.337, 3.828) | 0.83   | 1.713 (0.496, 5.912)  | 0.39   |
| Unknown              | 1.682 (0.953, 2.967) | 0.07   | 2.110 (1.174, 3.793)  | 0.01   |
| <b>Tumor size</b>    |                      |        |                       |        |
| <5.5 cm              | 1.000 (reference)    |        | –                     | –      |
| ≥5.5 cm              | 1.032 (0.603, 1.767) | 0.90   | –                     | –      |
| Unknown              | 0.523 (0.122, 2.241) | 0.38   | –                     | –      |
| <b>PORT</b>          |                      |        |                       |        |
| No                   | 1.000 (reference)    |        | 1.000 (reference)     |        |
| Yes                  | 0.919 (0.551, 1.532) | 0.74   | 1.150 (0.677, 1.952)  | 0.60   |

OS, overall survival; PSM, propensity score matching; HR, hazard ratio; CI, confidence interval; WHO, World Health Organization; NOS, not otherwise specified; PORT, postoperative radiotherapy.

**Table S2** Factors associated with CSS in patients with stage IIB thymoma before PSM

| Factors              | Univariate analysis   |      | Multivariate analysis |      |
|----------------------|-----------------------|------|-----------------------|------|
|                      | HR (95% CI)           | P    | HR (95% CI)           | P    |
| <b>Age</b>           |                       |      |                       |      |
| <65 years            | 1.000 (reference)     |      | –                     | –    |
| ≥65 years            | 1.581 (0.442, 5.654)  | 0.48 | –                     | –    |
| <b>Gender</b>        |                       |      |                       |      |
| Male                 | 1.000 (reference)     |      | –                     | –    |
| Female               | 1.024 (0.296, 3.541)  | 0.97 | –                     | –    |
| <b>Race</b>          |                       |      |                       |      |
| White                | 1.000 (reference)     |      | –                     | –    |
| Black                | 2.188 (0.441, 10.845) | 0.33 | –                     | –    |
| Others               | 0.931 (0.188, 4.614)  | 0.93 | –                     | –    |
| <b>WHO histology</b> |                       |      |                       |      |
| Low risk             | 1.000 (reference)     |      | 1.000 (reference)     |      |
| High risk            | 1.209 (0.202, 7.238)  | 0.83 | 1.156 (0.187, 7.162)  | 0.87 |
| NOS                  | 3.113 (0.742, 13.052) | 0.12 | 2.686 (0.634, 11.386) | 0.18 |
| <b>Chemotherapy</b>  |                       |      |                       |      |
| No                   | 1.000 (reference)     |      | 1.000 (reference)     |      |
| Yes                  | 3.913 (0.352, 43.522) | 0.26 | 3.414 (0.297, 39.287) | 0.32 |
| Unknown              | 3.252 (0.646, 16.379) | 0.15 | 2.603 (0.500, 13.557) | 0.25 |
| <b>Tumor size</b>    |                       |      |                       |      |
| <5.5 cm              | 1.000 (reference)     |      | –                     | –    |
| ≥5.5 cm              | 1.873 (0.389, 9.028)  | 0.43 | –                     | –    |
| Unknown              | 2.764 (0.249, 30.652) | 0.40 | –                     | –    |
| <b>PORT</b>          |                       |      |                       |      |
| No                   | 1.000 (reference)     |      | 1.000 (reference)     |      |
| Yes                  | 2.331 (0.495, 10.979) | 0.28 | 2.159 (0.455, 10.237) | 0.33 |

CSS, cancer-specific survival; PSM, propensity score matching; HR, hazard ratio; CI, confidence interval; WHO, World Health Organization; NOS, not otherwise specified; PORT, postoperative radiotherapy.

**Table S3** Baseline characteristics before and after PSM for Asians

| Characteristics | Before PSM             |                    |      | After PSM              |                    |       |
|-----------------|------------------------|--------------------|------|------------------------|--------------------|-------|
|                 | Non-PORT (n=23), n (%) | PORT (n=38), n (%) | P    | Non-PORT (n=18), n (%) | PORT (n=18), n (%) | P     |
| Age             |                        |                    | 0.34 |                        |                    | >0.99 |
| <65 years       | 15 (65.2)              | 29 (76.3)          |      | 14 (77.8)              | 14 (77.8)          |       |
| ≥65 years       | 8 (34.8)               | 9 (23.7)           |      | 4 (22.2)               | 4 (22.2)           |       |
| Gender          |                        |                    | 0.19 |                        |                    | >0.99 |
| Male            | 10 (43.5)              | 23 (60.5)          |      | 8 (44.4)               | 8 (44.4)           |       |
| Female          | 13 (56.5)              | 15 (39.5)          |      | 10 (55.6)              | 10 (55.6)          |       |
| WHO histology   |                        |                    | 0.39 |                        |                    | 0.33  |
| Low risk        | 12 (52.2)              | 15 (39.5)          |      | 7 (38.9)               | 8 (44.4)           |       |
| High risk       | 5 (21.7)               | 15 (39.5)          |      | 5 (27.8)               | 8 (44.4)           |       |
| NOS             | 6 (26.1)               | 8 (21.1)           |      | 6 (33.3)               | 2 (11.1)           |       |
| Chemotherapy    |                        |                    | 0.91 |                        |                    | >0.99 |
| No              | 15 (65.2)              | 23 (60.5)          |      | 11 (61.1)              | 12 (66.7)          |       |
| Yes             | 2 (8.7)                | 3 (7.9)            |      | 1 (5.6)                | 0 (0.0)            |       |
| Unknown         | 6 (26.1)               | 12 (31.6)          |      | 6 (33.3)               | 6 (33.3)           |       |
| Tumor size      |                        |                    | 0.81 |                        |                    | >0.99 |
| <5.5 cm         | 8 (34.8)               | 16 (42.1)          |      | 7 (38.9)               | 7 (38.9)           |       |
| ≥5.5 cm         | 14 (60.9)              | 20 (52.6)          |      | 10 (55.6)              | 10 (55.6)          |       |
| Unknown         | 1 (4.3)                | 2 (5.3)            |      | 1 (5.6)                | 1 (5.6)            |       |

PSM, propensity score matching; PORT, postoperative radiotherapy; NOS, not otherwise specified.
